# 1 Emotion Schemas are Embedded in the Human Visual System

2 Philip A. Kragel<sup>1,2\*</sup>, Marianne Reddan<sup>1</sup>, Kevin S. LaBar<sup>3</sup>, and Tor D. Wager<sup>1\*</sup>

- 3 1. Department of Psychology and Neuroscience and the Institute of Cognitive Science, University of  
4 Colorado, Boulder, CO, USA  
5 2. Institute for Behavioral Genetics, the University of Colorado, Boulder, CO, USA  
6 3. Department of Psychology and Neuroscience and the Center for Cognitive Neuroscience, Duke  
University, Durham, NC, USA

\*corresponding authors: [philip.kragel@colorado.edu](mailto:philip.kragel@colorado.edu), [tor.wager@colorado.edu](mailto:tor.wager@colorado.edu)

7 **Abstract**

8 Theorists have suggested that emotions are canonical responses to situations ancestrally linked to survival. If so,  
9 then emotions may be afforded by features of the sensory environment. However, few computationally explicit  
10 models describe how combinations of stimulus features evoke different emotions. Here we develop a  
11 convolutional neural network that accurately decodes images into 11 distinct emotion categories. We validate the  
12 model using over 25,000 images and movies and show that image content is sufficient to predict the category and  
13 valence of human emotion ratings. In two fMRI studies, we demonstrate that patterns of human visual cortex  
14 activity encode emotion category-related model output and can decode multiple categories of emotional  
15 experience. These results suggest that rich, category-specific emotion representations are embedded within the  
16 human visual system.

## 17 **Introduction**

18 Emotions are thought to be canonical responses to situations ancestrally linked to survival (Tooby and  
19 Cosmides) or the well-being of an organism (Lazarus 1968). Sensory processing plays a prominent role in nearly  
20 every theoretical explanation of emotion (e.g., Scherer 1984, Ekman 1992, Russell 2003, Niedenthal 2007, Barrett  
21 2017), yet neuroscientific views have historically suggested that emotion is driven by specialized brain regions,  
22 e.g., in the limbic system (MacLean 1952) and related subcortical circuits (Panksepp 1998), or in some theories in  
23 neural circuits specialized for emotion categories such as fear (Adolphs 2013) and sadness (Mayberg, Liotti et al.  
24 1999). According to these longstanding views, activity in sensory cortex (e.g., visual areas V1-V4) is thought to  
25 be *antecedent* to emotion, but not central to emotional appraisals, feelings, or responses. However, recent  
26 theoretical developments (Pessoa 2008, Barrett and Bar 2009, Pessoa and Adolphs 2010) and empirical  
27 observations suggest that sensory and emotional representations may be much more intertwined than previously  
28 thought. Activity in visual cortex is enhanced by emotionally significant stimuli (Morris, Friston et al. 1998,  
29 Vuilleumier, Richardson et al. 2004), and single neurons learn to represent the affective significance of stimuli.  
30 For example, neurons in V1 (Shuler and Bear 2006), V4 (Haenny and Schiller 1988), and inferotemporal cortex  
31 (Mogami and Tanaka 2006, Eradath, Mogami et al. 2015, Sasikumar, Emeric et al. 2018) selectively respond to  
32 rewarding stimuli. In addition, multivariate patterns of human brain activity that predict emotion-related outcomes  
33 often utilize information encoded in visual cortex (Chang, Gianaros et al. 2015, Kragel and LaBar 2015,  
34 Krishnan, Woo et al. 2016, Saarimaki, Gotsopoulos et al. 2016, Saarimaki, Ejtehadian et al. 2018).

35 There are at least two ways of interpreting this evidence. On one hand, emotion-related activity in sensory  
36 areas could reflect a general enhancement of visual processing for relevant, novel, or attended percepts  
37 (O'Connor, Fukui et al. 2002, McAlonan, Cavanaugh et al. 2008). Stronger sensory responses to emotionally  
38 relevant percepts can also be evolutionarily conserved (relevant in ancestral environments (Öhman and Mineka  
39 2003)) or learned during development (Held and Hein 1963, Recanzone, Schreiner et al. 1993, Shuler and Bear  
40 2006). In this case, affective stimuli evoke stronger sensory responses, but the information about emotion content  
41 (fear vs. anger, sadness vs. joy) is thought to be represented elsewhere. Alternatively, perceptual representations

42 in sensory (e.g., visual) cortex could reflect the *content* of emotional responses in a rich way; specific  
43 configurations of perceptual features could afford specific types, or categories, of emotional responses, including  
44 fear, anger, desire, joy, etc. In this case, neural codes in sensory cortices might represent information directly  
45 relevant for the nature of emotional feelings and responses.

46 The latter view is broadly compatible with appraisal theories (Moors 2018) and more recent theories of  
47 emotions as constructed from multiple perceptual, mnemonic, and conceptual ingredients (Russell 2003, Barrett  
48 2006, Barrett 2017). In the former, *emotion schemas* (Izard 2007) are canonical patterns of organism-environment  
49 interactions that afford particular emotions. For example, scenes of carnage evoke rapid responses related to  
50 disgust or horror, and later (integrating conceptual beliefs about the actors and other elements), compassion,  
51 anger, or other emotions. Scenes with attractive, scantily clad people evoke schemas related to sex; scenes with  
52 delicious food evoke schemas related to consumption; and so on. In these cases, the sensory elements of the scene  
53 do not fully determine the emotional response—other ingredients are involved, including one’s personal life  
54 experiences, goals and interoceptive states (Bower 1981, Izard 2007)—but the sensory elements *are* sufficient to  
55 convey the schema or situation that the organism must respond to. Initial appraisals of emotion schemas (often  
56 called “System 1” appraisals) can be made rapidly (Lazarus 1966, Kahneman and Egan 2011) and in some cases  
57 unconsciously, and unconscious emotion may drive preferences and shape learning (Zajonc 1984, Berridge and  
58 Winkielman 2003, Pessiglione, Seymour et al. 2006). Emotion schemas are also content-rich in the sense that they  
59 sharply constrain the repertoire of emotional responses afforded by a given schema. For example, horror scenes  
60 might afford fear, anger, or compassion, but other kinds of emotional responses (sadness, nurturing, playfulness)  
61 would be ancestrally inappropriate. Thus, while some affective primitives (representations related to survival and  
62 well-being) are related to biologically older subcortical brain systems (MacLean 1952, Panksepp 1998) and  
63 involve relatively little cognitive processing (Ekman and Cordaro 2011), canonical, category-specific *emotion*  
64 *schemas* exist and may be embedded in part in human sensory cortical systems.

65 The hypothesis that emotion schemas are embedded in sensory systems makes several predictions that  
66 have not, to our knowledge, been tested. First, models constructed from image features *alone* should be able to (a)

67 predict normative ratings of emotion category made by humans and (b) differentiate *multiple emotion categories*.  
68 Second, representations in such models should map onto distinct patterns of brain activity in sensory (i.e., visual)  
69 cortices. Third, sensory areas, and particularly visual cortex, should be sufficient to decode multiple emotion  
70 categories. Here, we test each of these hypotheses.

71 To test Predictions 1 and 2, we developed a convolutional neural network (CNN) whose output is a  
72 probabilistic representation of the emotion category of a picture or video, and used it to classify images into 20  
73 different emotion categories using a large stimulus set of 2,232 emotional video clips (Cowen and Keltner 2017).  
74 We validated this model, called EmoNet, in three different contexts, by predicting: (i) normative emotion  
75 categories of video clips not used for training; (ii) normative emotional intensity ratings for International  
76 Affective Picture System (IAPS), an established set of emotional images (Lang, Bradley et al. 2008); and (iii) the  
77 genre of cinematic movie trailers, which are designed to manipulate emotion by presenting different visual cues  
78 (Rasheed and Shah 2002). To test whether EmoNet can uniquely identify multiple emotion categories, we  
79 developed and applied a statistical framework for estimating the number of discriminable emotion categories. To  
80 test Prediction 2, we used machine learning approaches to find patterns of brain activity in the occipital lobe  
81 (measured via fMRI,  $N = 18$ ) linked to emotion category-related output from EmoNet. To test Prediction 3, in a  
82 separate fMRI study ( $N = 32$ ), we verified that patterns of occipital lobe activity can decode the category of  
83 emotional responses elicited by videos and music (across 5 categories). Our results are consistent with prior  
84 research showing that different patterns of visual cortical activity are associated with different emotion categories  
85 (Chang, Gianaros et al. 2015, Kragel and LaBar 2015, Krishnan, Woo et al. 2016, Saarimaki, Gotsopoulos et al.  
86 2016, Saarimaki, Ejtehadian et al. 2018), but goes beyond them to (1) rigorously test whether sensory  
87 representations are sufficient for accurate decoding, and (2) provide a computationally explicit account of how  
88 sensory inputs are transformed into emotion-related codes.

## 89 **Classifying visual images into multiple emotion categories**

90 EmoNet (**Figure 1**) was based on the popular AlexNet image recognition model, and used representations  
91 learned from AlexNet as input into a final fully-connected layer trained to predict the normative emotion category

92 of over 137,482 images extracted from videos (Cowen and Keltner 2017) with normative emotion categories were  
93 based on ratings from 853 subjects. We tested EmoNet on 24,634 images from 400 videos not included in the  
94 training set. EmoNet accurately decoded normative human ratings of emotion categories, providing support for  
95 Prediction 1. The human-consensus category was among the top 5 predictions made by the model (top-5 accuracy  
96 in 20-way classification) for 62.6% of images (chance = 27.95%;  $P < .0001$ , permutation test); the top-1 accuracy  
97 in a 20-way classification was 23.09% (chance = 5.00%;  $P < .0001$ , permutation test); the average area under the  
98 receiver operating characteristic curve across the 20 categories was .745 (Cohen's  $d = 0.945$ ), indicating that  
99 emotions could be discriminated from one another with large effect sizes.

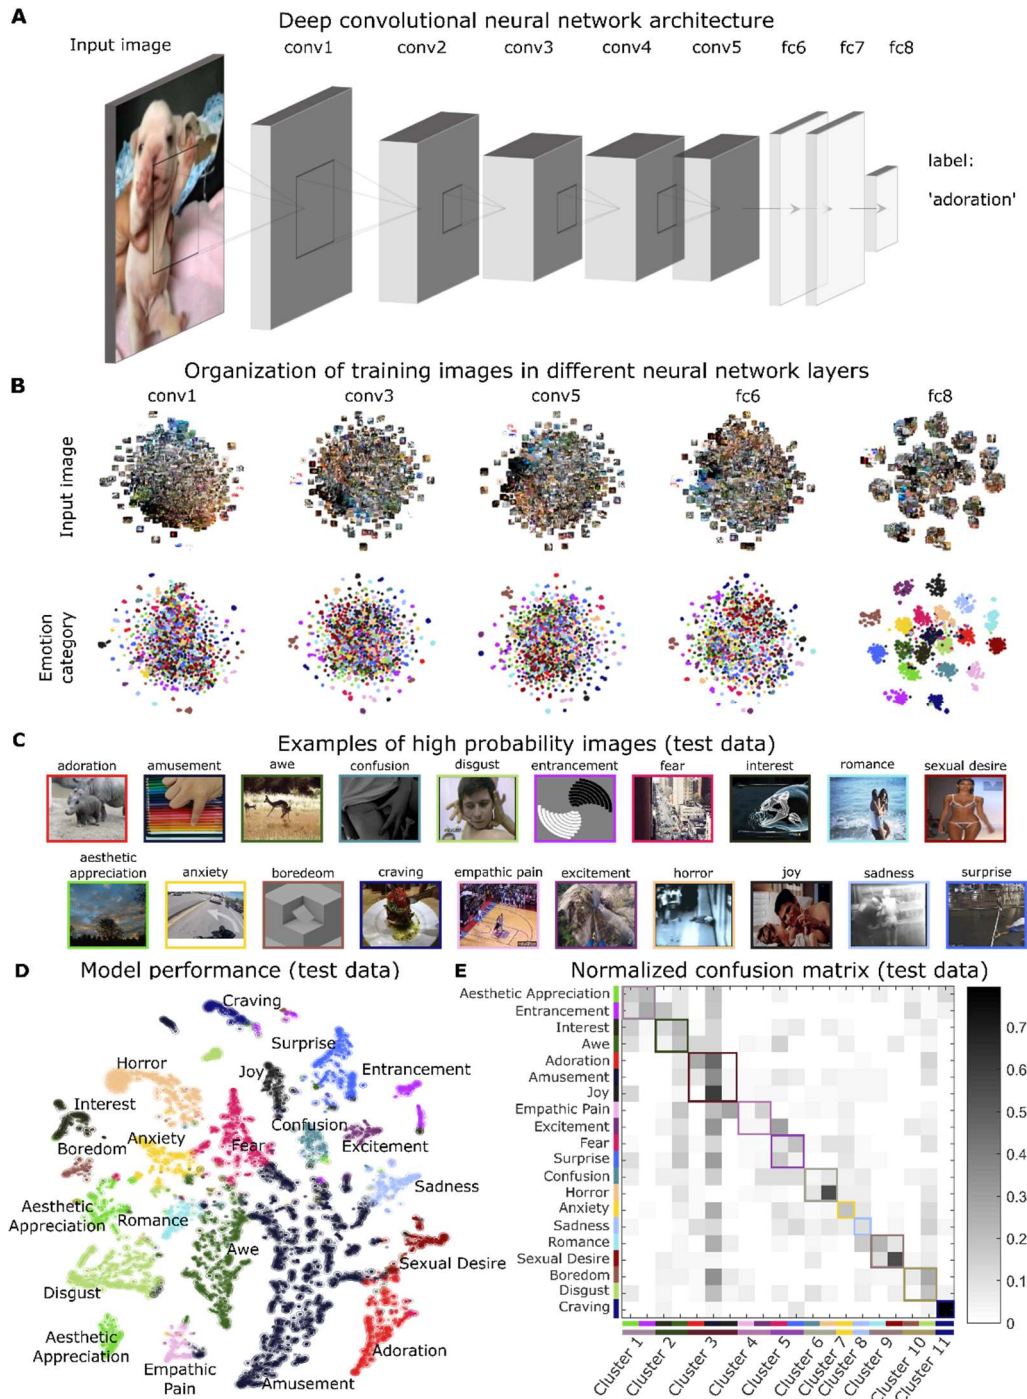

**Figure 1.** Predicting emotional responses to images with a deep convolutional neural network. (a) Model architecture follows that of AlexNet (five convolutional layers followed by three fully-connected layers), only the last fully-connected layer has been retrained to predict emotion categories. (b) Activation of artificial neurons in three convolutional layers (1, 3, and 5) and the last two fully-connected layers (6 and 8) of the network. Scatterplots depict *t*-distributed Stochastic Neighbor Embedding (*t*-SNE) plots of activation for a random selection of 1,000 units in each layer. The first four layers come from a model developed to perform object-recognition (Krizhevsky, Sutskever et al. 2012), and the last-layer was retrained to predict emotion categories from an extensive database of video clips. Note the progression away from low-level image features towards more abstract emotion schemas. (c) Examples of randomly selected images assigned to each class in hold-out test data (images from videos that were not used for training the model). Pictures were not chosen to match target classes. Some examples show contextually-driven prediction, e.g., an image of a

100  
101  
102  
103  
104  
105  
106  
107  
108  
109  
110  
111

112 sporting event is classified as ‘empathic pain’ even though no physical injury is apparent. (d) *t*-SNE plot  
113 shows model predictions in test data. Colors indicate the predicted class, and circled points indicate that the  
114 ground truth label was in the top five predicted categories. Although *t*-SNE does not preserve global  
115 distances, the plot does convey local clustering of emotions such as ‘amusement’ and ‘adoration.’ (e)  
116 Normalized confusion matrix shows the proportion of test data that are classified into the twenty categories.  
117 Rows correspond to the correct category of test data, and columns correspond to predicted categories. Gray  
118 colormap indicates the proportion of predictions in the test dataset, where each row sums to a value of 1.  
119 Correct predictions fall on the diagonal of the matrix, whereas erroneous predictions comprise off-diagonal  
120 elements. Categories the model is biased towards predicting, such as ‘amusement,’ are indicated by dark  
121 columns. Data-driven clustering of errors shows 11 groupings of emotions that are all distinguishable from  
122 one another (see Materials and Methods and Figure S1).

123 Crucially, EmoNet accurately discriminated *multiple emotion categories* in a relatively fine-grained way,  
124 though model performance varied across categories. ‘Craving’ (AUC = .987, 95% CI = [.980 .990];  $d = 3.13$ ;  $P <$   
125 .0001), ‘sexual desire’ (AUC = .965, 95% CI = [.960 .968];  $d = 2.56$ ;  $P <$  .0001), ‘entrancement’ (AUC = .902,  
126 95% CI = [.884 .909];  $d = 1.83$ ;  $P <$  .0001), and ‘horror’ (AUC = .876, 95% CI = [.872 .883];  $d = 1.63$ ;  $P <$  .0001)  
127 were the most accurately predicted categories. On the other end of the performance spectrum, ‘confusion’ (AUC  
128 = .636, 95% CI = [.621 .641];  $d = .490$ ;  $P <$  .0001), ‘awe’ (AUC = .615, 95% CI = [.592 .629];  $d = .415$ ;  $P <$   
129 .0001), and ‘surprise’ (AUC = .541, 95% CI = [.531 .560];  $d = .147$ ;  $P = .0002$ ) exhibited the lowest levels of  
130 performance, despite exceeding chance levels. Some emotions were highly confusable in the test data, such as  
131 ‘amusement’, ‘adoration’, and ‘joy’, suggesting they have similar visual features despite being distinct from other  
132 emotions (**Figure S1**). Thus, visual information is sufficient for predicting some emotion schemas, particularly  
133 those that have a strong relationship with certain high-level visual categories, such as ‘craving’ or ‘sexual desire’,  
134 whereas other sources of information are necessary to discriminate emotions that are conceptually abstract or  
135 depend on temporal dynamics (e.g., ‘confusion’ or ‘surprise’).

136 To further assess the number of distinct emotion categories represented by EmoNet, we developed two  
137 additional tests of (1) dimensionality and (2) emotion category discriminability. First, we tested the possibility  
138 that EmoNet is tracking a lower-dimensional space, such as one organized by *valence* and *arousal* (Russell 1980),  
139 rather than a rich category-specific representation. Principal components analysis (PCA) on model predictions in  
140 the hold-out dataset indicated that many components were required to explain model predictions; 17 components  
141 were required to explain 95% of the model variance, with most components being mapped to only a single  
142 emotion (i.e., exhibiting simple structure (Carroll 1953), see **Figure S1**). To test category discriminability, we



143 developed a test of how many emotion categories were *uniquely discriminable from each other category* in  
144 EmoNet's output (**Figure 1E**; see Supplementary Text for details of the method). The results indicated that  
145 EmoNet differentiated 11 (95% CI = [10 to 14]) distinct emotion categories from one another, supporting the  
146 sensory embedding hypothesis.

### 147 **Modeling valence and arousal as combinations of emotion-related features**

148 To further test EmoNet's generalizability, we tested it on three additional image and movie databases. A  
149 first test applied EmoNet to images in the International Affective Picture System (IAPS), a widely studied set of  
150 images used to examine the influence of positive and negative affect on behavior, cognitive performance,  
151 autonomic responses, and brain activity (Lang and Bradley 2007). The IAPS dataset provides an interesting test  
152 because human norms for emotion intensity ratings are available, and because IAPS images often elicit mixed  
153 emotions that include responses in multiple categories (Mikels, Fredrickson et al. 2005). Much of the variance in  
154 these emotion ratings is explained by a two-dimensional model of valence (pleasant to unpleasant) and arousal  
155 (calm to activated), and emotion categories are reliably mapped into different portions of the valence-arousal  
156 space (Bradley and Lang 1999, Tellegen, Watson et al. 1999, Fontaine, Scherer et al. 2007, Warriner, Kuperman  
157 et al. 2013), often in a circumplex pattern (Russell 1980, Plutchik 1997, Russell and Barrett 1999, Cowen and  
158 Keltner 2017). These features allowed us to assess whether EmoNet predicts normative human ratings of valence  
159 and arousal across the full IAPS dataset, and whether EmoNet organizes emotions in a low-dimensional or  
160 circumplex structure similar to human ratings.

161 We constructed predictive models using partial least squares (PLS) regression of human valence and  
 162 arousal on features from the last fully connected layer of EmoNet, which has 20 units, one for each emotion

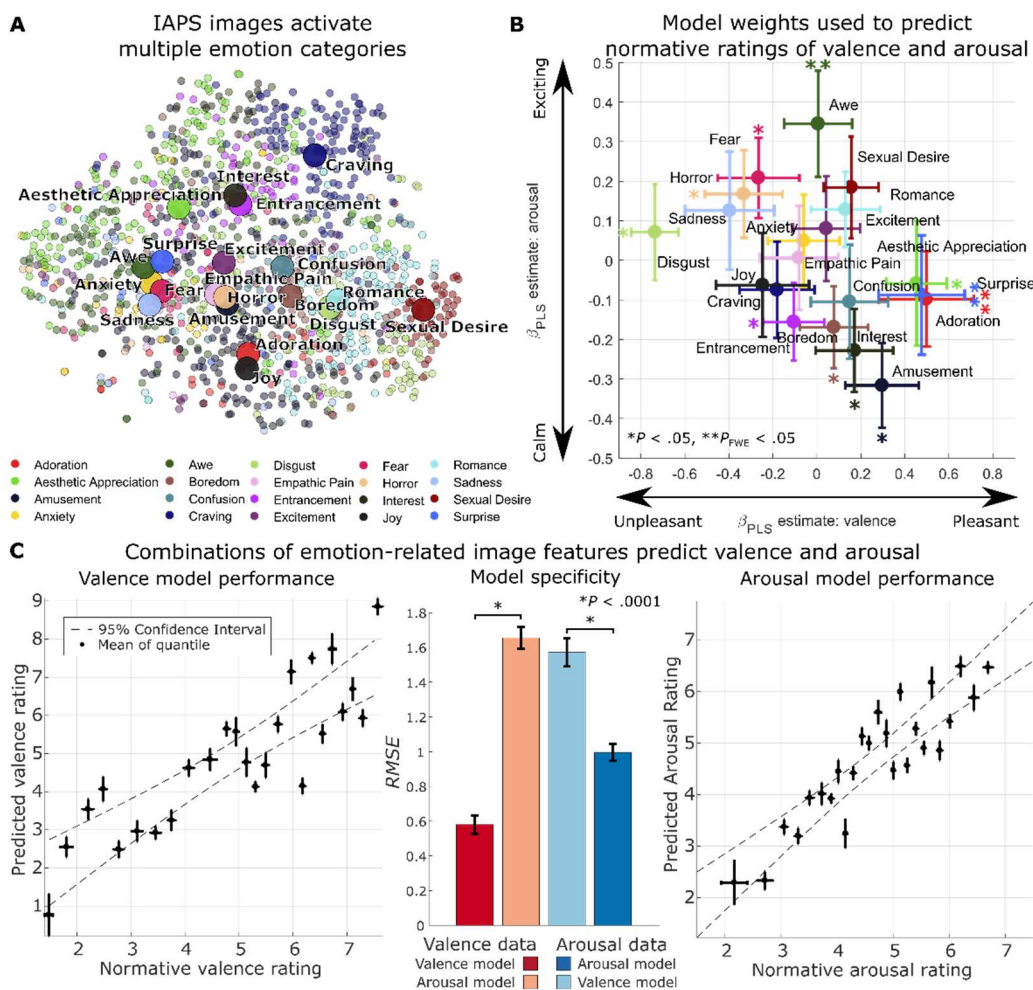

**Figure 2.** Emotion-related image features predict normative ratings of valence and arousal. (a) Depiction of the full International Affective Picture System (IAPS), with picture locations determined by *t*-Distributed Stochastic Neighbor Embedding of activation of the last fully connected layer of EmoNet. The color of each point indicates the emotion category with the greatest score for each image. Large circles indicate mean location for each category. Combinations of loadings on different emotion categories are used to make predictions about normative ratings of valence and arousal. (b) Parameter estimates indicate relationships identified using Partial least squares regression to link the 20 emotion categories to the dimensions of valence (*x*-axis) and arousal (*y*-axis). Bootstrap means and standard errors are shown by circles and error bars. For predictions of valence, positive parameter estimates indicate increasing pleasantness, and negative parameter estimates indicate increasing unpleasantness; for predictions of arousal, positive parameter estimates indicate a relationship with increasing arousal and negative estimates indicate a relationship with decreasing arousal.  $*P < .05$ ,  $**P_{FWE} < .05$  (c) Cross-validated model performance. Left and right panels show normative ratings of valence and arousal, plotted against model predictions. Individual points reflect the average rating for each of 25 quintiles of the full IAPS set. Error bars indicate the standard deviation of normative ratings (*x*-axis,  $N = 47$ ) and the standard deviation of repeated 10-fold cross-validation estimates (*y*-axis,  $N = 10$ ). Bar plots in the middle panel show overall root-mean-square error (*RMSE*, lower values indicate better performance) for models tested on valence data (left bars, red hues) and arousal data (right bars, blue hues). Error bars indicate the standard deviation of repeated 10-fold cross-validation.  $*P < .0001$  corrected resampled *t*-test. The full convolutional neural network model and weights for predicting valence and arousal are available at <https://github.com/canlab> for public use.

163 category. We analyzed the accuracy in predicting valence and arousal ratings of out-of-sample test images using  
164 10-fold cross-validation (Kohavi 1995), stratifying folds based on normative ratings. We also analyzed the model  
165 weights ( $\beta_{PLS}$ ) mapping emotion categories to arousal and valence, to construct a valence and arousal space from  
166 the activity of emotion category units in EmoNet. The models strongly predicted valence and arousal ratings for  
167 new (out-of-sample) images. The model predicted valence ratings with  $r = .88$  ( $P < .0001$ , permutation test,  
168  $RMSE = 0.9849$ ), and arousal ratings with  $r = .85$  ( $P < .0001$ ,  $RMSE = 0.5843$ ). A follow-up generalization test  
169 using these models to predict normative ratings on a second, independent image database (Kurdi, Lozano et al.  
170 2017)—with no model retraining—showed similar levels of performance for both valence ( $r = .83$ ,  $RMSE =$   
171  $1.605$ ) and arousal ( $r = .84$ ,  $RMSE = 1.696$ ). Thus, EmoNet explained over 60% of the variance in average human  
172 ratings of pleasantness and arousal when viewing IAPS images. This level of prediction indicate that EmoNet  
173 predicts valence and arousal in stimuli that elicit mixed emotions.

174 In addition, the categorical emotion responses in EmoNet's representation of each image were arranged in  
175 valence-arousal space in a manner similar to the human circumplex model (Russell 1980) (**Figure 2b**), though  
176 with some differences from human raters. Units coding for 'adoration' ( $\hat{\beta} = .5002$ , 95% CI = [.2722 1.0982]),  
177 'aesthetic appreciation' ( $\hat{\beta} = .4508$ , 95% CI = [.1174 .6747]), and 'surprise' ( $\hat{\beta} = .4781$ , 95% CI = [.3027 1.1476])  
178 were most strongly associated with positive valence across categories. Units coding for 'disgust' ( $\hat{\beta} = -.7377$ ,  
179 95% CI = [-1.0365 -.6119]), 'entrancement' ( $\hat{\beta} = -.1048$ , 95% CI = [-.5883 -.0010]), and 'horror' ( $\hat{\beta} = -.3311$ ,  
180 95% CI = [-.7591 -.0584]) were the most negatively valenced. The highest loadings on arousal were in units  
181 coding for 'awe' ( $\hat{\beta} = .0285$ , 95% CI = [.0009 .0511]) and 'horror' ( $\hat{\beta} = .0322$ , 95% CI = [.0088 .0543]), and the  
182 lowest-arousal categories were 'amusement' ( $\hat{\beta} = -.3189$ , 95% CI = [-.5567 -.1308]), 'interest' ( $\hat{\beta} = -.2310$ , 95%  
183 CI = [-.4499 -.0385]) and 'boredom' ( $\hat{\beta} = -.1605$ , 95% CI = [-.4380 -.0423]). The marked similarities with the  
184 human affective circumplex demonstrate that model representations of emotion categories reliably map onto  
185 dimensions of valence and arousal. However, these findings do *not* indicate that the valence-arousal space is  
186 sufficient to encode the full model output; in fact, we estimate that doing so requires 17 dimensions, and the  
187 loadings in Figure 2b do not exhibit a classic circumplex pattern. The discrepancies (e.g., 'surprise' is generally

188 considered high-arousal and neutral valence, and ‘awe’ is typically positively valenced) highlight that the model  
189 was designed to track visual features that might serve as ingredients of emotion, but do not capture human  
190 feelings in all respects. For example, while people may typically rate ‘awe’ as a positive experience, ‘awe-  
191 inspiring’ scenes often depict high-arousal activities (e.g., extreme skiing or base jumping).

## 192 **Classifying the genre of movie trailers based on their emotional content**

193 A second test examined whether emotion categories could meaningfully be applied to dynamic stimuli  
194 such as videos. We tested EmoNet’s performance in classifying the genre of 28 randomly sampled movie trailers  
195 from romantic comedy ( $N = 9$ ), action ( $N = 9$ ), and horror ( $N = 10$ ) genres (see Materials and Methods for  
196 sampling and selection criteria). EmoNet made emotion predictions for each movie frame (for an example see the  
197 time series in **Figure 3**). PLS regression was used to predict movie genres from the average activation over time  
198 in EmoNet’s final emotion category layer, using one-vs-all classification (Rifkin and Klautau 2004) with 10-fold  
199 cross-validation to estimate classification accuracy in independent movie trailers.

200 The results indicated that EmoNet’s frame-by-frame predictions tracked meaningful variation in  
201 emotional scenes across time (**Figure 3a**), and that mean emotion category probabilities accurately classified the  
202 trailers (**Figure 3b-c**), with three-way classification accuracy of 71.43% ( $P < .0001$ , permutation test; chance is  
203 35.7%). The average area under the receiver operating characteristic curve for the three genres was .855 (Cohen’s  
204  $d = 1.497$ ; **Figure 3c**). Classification errors were made predominantly between action and horror movies  
205 (26.32%), whereas romantic comedies were not misclassified, indicating that they had the most distinct features.

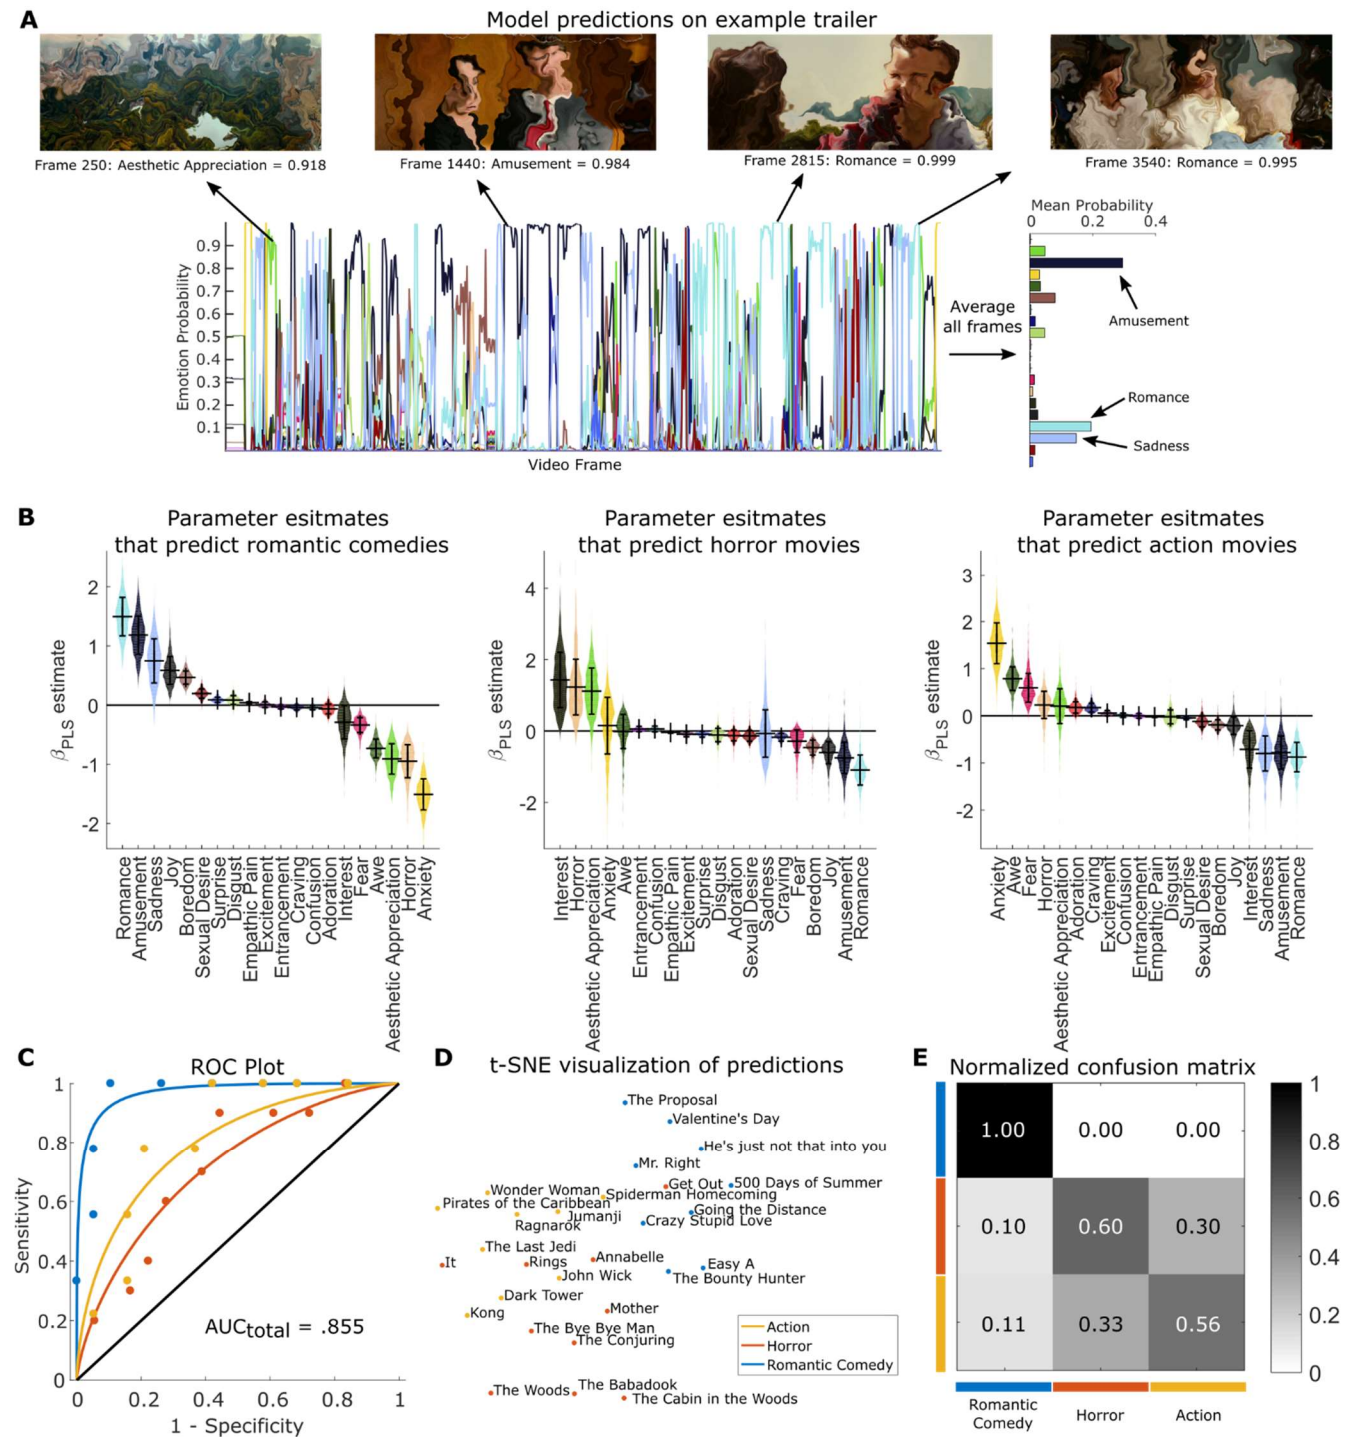

206  
207  
208  
209  
210  
211  
212  
213  
214  
215

**Figure 3.** Identifying the genre of movie trailers using emotional image features. (a) Emotion prediction for a single movie trailer. Time-courses indicate model outputs on every fifth frame of the trailer for the twenty emotion categories, with example frames shown above. A summary of the emotional content of the trailer is shown on the right, which is computed by averaging predictions across all analyzed frames. (b) Partial least squares parameter estimates indicate which emotions lead to predictions of different movie genres. Violin plots depict the bootstrap distributions (1,000 iterations) for parameters estimates differentiating each genre from all others. Error bars indicate bootstrap standard error. (c) Receiver operator characteristic plots depict 10-fold cross-validation performance for classification. The solid black line indicates chance performance. (d) *t*-SNE plot based on the average activation of all 20 emotions. (e) Confusion matrix depicting misclassification of different genres; rows indicate the ground truth label and columns indicate predictions. The grayscale color bar shows the proportion of trailers assigned to each class.

216 Movie genres are systematically associated with different emotion schemas: romantic comedies were  
217 predicted by increased activation of units coding for ‘romance’ ( $\hat{\beta} = 1.499$ , 95% CI = [1.001 2.257]),  
218 ‘amusement’ ( $\hat{\beta} = 1.167$ , 95% CI = [0.639 2.004]), and ‘sadness’ ( $\hat{\beta} = 0.743$ , 95% CI = [0.062 1.482]); horror  
219 trailers were predicted by activation of ‘interest’ ( $\hat{\beta} = 1.389$ , 95% CI = [0.305 3.413]), ‘horror’ ( $\hat{\beta} = 1.206$ , 95%  
220 CI = [0.301 3.536]), and ‘aesthetic appreciation’ ( $\hat{\beta} = 1.117$ , 95% CI = [0.259 2.814]); and action trailers were  
221 predicted by activation of ‘anxiety’ ( $\hat{\beta} = 1.526$ , 95% CI = [0.529 2.341]), ‘awe’ ( $\hat{\beta} = 0.769$ , 95% CI = [0.299  
222 1.162]), and ‘fear’ ( $\hat{\beta} = 0.575$ , 95% CI = [0.094 1.109]). As with IAPS images, EmoNet tracked canonical visual  
223 scenes that can lead to several kinds of emotional experience based on context. For instance, some horror movies  
224 in this sample included scenic shots of woodlands, which were classified as ‘aesthetic appreciation’, leading to  
225 high weights for ‘aesthetic appreciation’ on horror films. While such mappings illustrate how EmoNet output  
226 alone should not be over-interpreted in terms of human feelings, they also illustrate how emotion concepts can  
227 constrain the repertoire of feelings-in-context. A beautiful forest or children playing can be ominous when paired  
228 with other threatening context cues (e.g., scary music), but the emotion schema is incompatible with a range of  
229 other emotions (sadness, anger, interest, sexual desire, disgust, etc.).

## 230 **Decoding model representations of emotions from patterns of human brain activity**

231 If emotion schemas are afforded by visual scenes, then it should be possible to decode emotion category-  
232 related representations in EmoNet from activity in the human visual system. To test this hypothesis, we measured  
233 brain activity using fMRI while participants ( $N = 18$ ) viewed a series of 112 affective images that varied in  
234 affective content (see Materials and Methods for details). Treating EmoNet as a model of the brain (Yamins and  
235 DiCarlo 2016), we used PLS to regress patterns in EmoNet’s emotion category layer onto patterns of fMRI  
236 responses to the same images (e.g., see (Yamins, Hong et al. 2014) for an application of this approach to object  
237 recognition). We investigated the predictive performance, discriminability, and spatial localization of these  
238 mappings to shed light on how and where emotion-related visual scenes are encoded in the brain.

239           Because EmoNet was trained on visual images, we first explored how emotion schemas might emerge  
240 from activity in the human visual system, within a mask comprising the entire occipital lobe (7,214 voxels  
241 (Lancaster, Woldorff et al. 2000)). Patterns of occipital activity predicted variation in EmoNet’s emotion category  
242 units across images, with different fMRI patterns associated with different emotion categories (**Figure 4a**, for  
243 individual maps, see **Figure S2**). Multiple correlations between brain-based predictions and activation in EmoNet  
244 emotion category units were tested in out-of-sample individuals using leave-one-subject-out (Esterman, Tamber-  
245 Rosenau et al. 2010) cross-validation. These correlations were positive and significant for each of the 20 EmoNet  
246 emotion categories (mean  $r = 0.2819 \pm .0163$  (*SE*) across subjects, mean effect size  $d = 3.00$ , 76.93% of the noise  
247 ceiling,  $P < .0001$ , permutation test, see Supplementary Text). The highest average level of performance included  
248 ‘entrancement’ ( $r = 0.4537 \pm .0300$  (*SE*),  $d = 3.559$ , 77.03% of the noise ceiling,  $P < .0001$ ), ‘sexual desire’ ( $r =$   
249  $0.4508 \pm .0308$  (*SE*),  $d = 3.453$ , 79.01% of the noise ceiling,  $P < .0001$ ), and ‘romance’ ( $r = 0.3861 \pm .0203$  (*SE*),  
250  $d = 4.476$ , 72.34% of the noise ceiling,  $P < .0001$ ), whereas ‘horror’ ( $r = 0.1890 \pm .0127$  (*SE*),  $d = 3.520$ , 60.17%  
251 of the noise ceiling,  $P < .0001$ ), ‘fear’ ( $r = 0.1800 \pm .0216$  (*SE*),  $d = 1.963$ , 59.44% of the noise ceiling,  $P <$   
252  $.0001$ ), and ‘excitement’ ( $r = 0.1637 \pm .0128$  (*SE*),  $d = 3.004$ , 65.28% of the noise ceiling,  $P < .0001$ ), exhibited  
253 the lowest levels of performance.

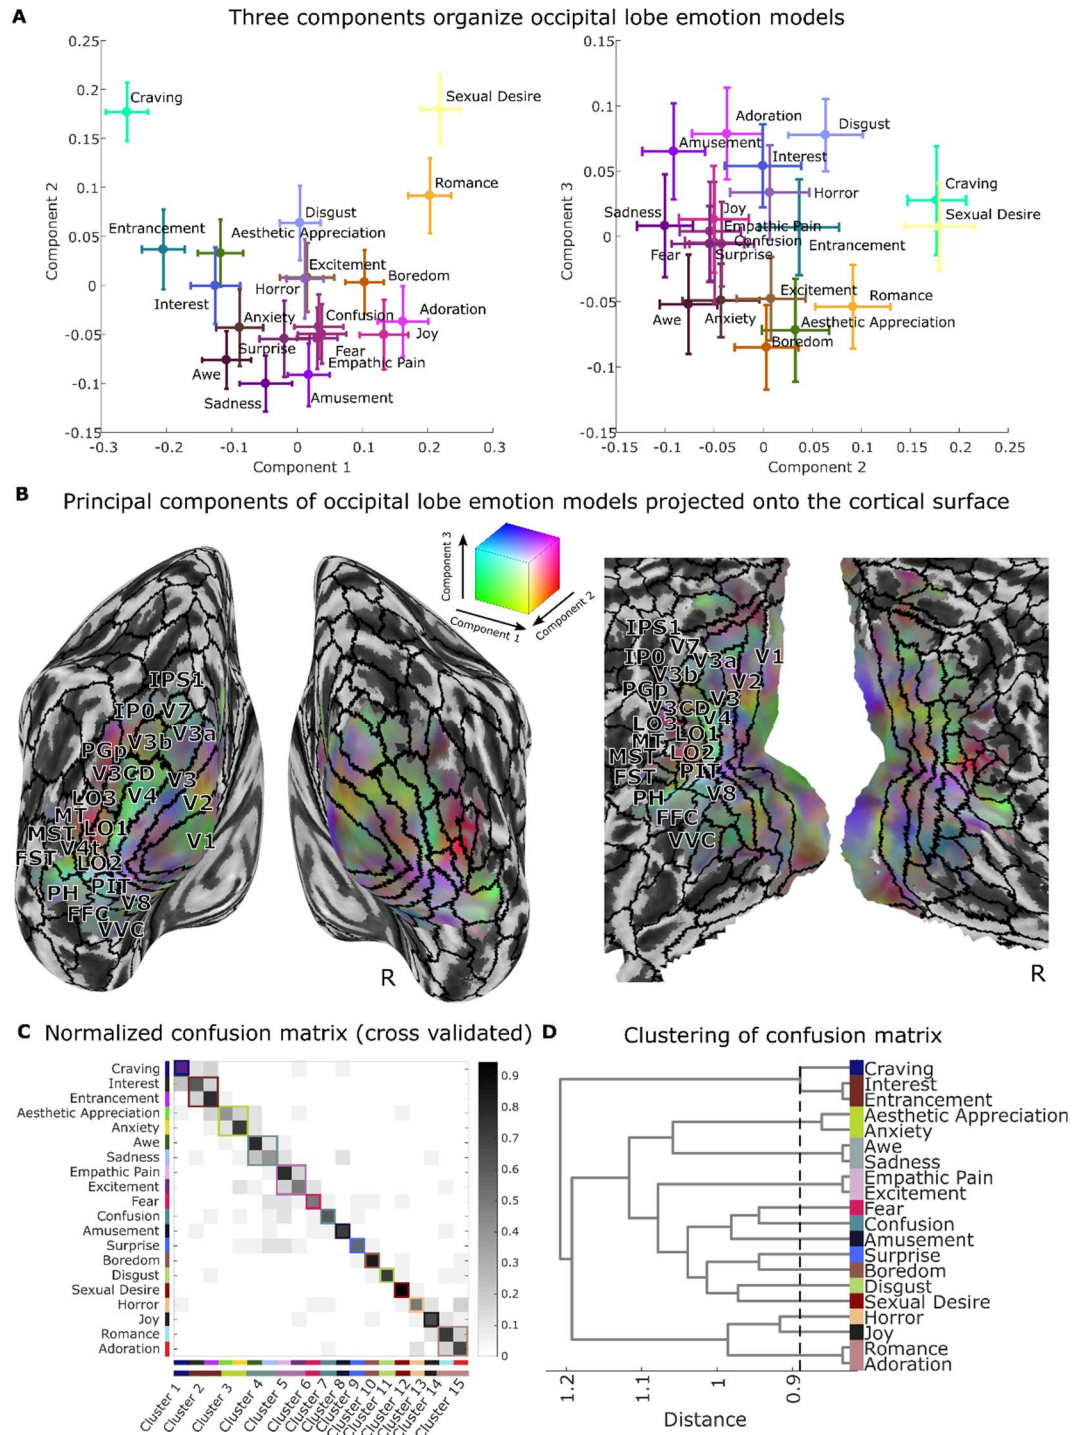

**Figure 4.** Visualization of the 20 occipital lobe models using principal components analysis (PCA) reveals three important emotion-related features of the visual system. (a) Scatter plots depict the location of 20 emotion categories in PCA space, with colors indicating loadings onto the first three principal components (PCs) identified from 7,214 voxels that retain approximately 95% of the spatial variance across categories. The color of each point is based on the component scores for each emotion (in an additive red-green-blue color space, PC<sub>1</sub> = red, PC<sub>2</sub> = green, PC<sub>3</sub> = blue). Error bars reflect bootstrap standard error. (b) Visualization of group average coefficients that show mappings between voxels and principal components. Colors are from the same space as depicted in panel (a). Solid black lines indicate boundaries of cortical regions based on a multi-modal parcellation of the cortex (Glasser, Coalson et al. 2016). Surface mapping and rendering were performed using

254

255

256

257

258

259

260

261

262

263



264 the CAT12 toolbox (Dahnke, Yotter et al. 2013, Gaser and Dahnke 2016). (c) Normalized confusion matrix  
265 shows the proportion of data that are classified into 20 emotion categories. Rows correspond to the correct  
266 category of cross validated data, and columns correspond to predicted categories. Gray colormap indicates the  
267 proportion of predictions in the dataset, where each row sums to a value of 1. Correct predictions fall on the  
268 diagonal of the matrix; erroneous predictions comprise off-diagonal elements. Data-driven clustering of errors  
269 shows 15 groupings of emotions that are all distinguishable from one another. (d) Visualization of distances  
270 between emotion groupings. Dashed line indicates minimum cutoff that produces 15 discriminable categories.  
271 Dendrogram was produced using Ward's linkage on distances based on the number of confusions displayed in  
272 panel (c). See Supplementary Text for a description and validation of the method.

273 To further test the number of discriminable emotion categories encoded in visual cortex, we constructed a  
274 confusion matrix for relationships between the visual cortical multivariate pattern responses and EmoNet emotion  
275 category units. For each study participant, we correlated the output from each of the 20 fMRI models (a vector  
276 with 112 values, one for each IAPS image) with vectors of activation across EmoNet's 20 emotion category units  
277 (producing a  $20 \times 20$  correlation matrix), using leave-one-subject out cross validation to provide an unbiased test.  
278 For each model, the EmoNet unit with the highest correlation was taken as the best-guess emotion category based  
279 on brain activity, and the resulting confusion matrix was averaged across participants. The confusion matrix is  
280 shown in **Figure 4c**, with correct predictions in 20-way classification (sensitivity) shown on the diagonal, and  
281 false alarms ( $1 - \text{specificity}$ ) on the off-diagonal. The average sensitivity across subjects was  $66.67 \pm 11.4\%$   
282 (*SEM*) and specificity was  $97.37 \pm .88\%$ ; thus, visual cortical activity was mapped onto EmoNet's categories with  
283 a positive predictive value of  $65.45 \pm 10.4\%$  (chance is approximately 5%). In addition, as above, we estimated  
284 the number of uniquely discriminable categories by clustering the 20 the categories and searches the clustering  
285 dendrogram to determining the maximum number of clusters (minimum link distance) at which each cluster was  
286 significantly discriminable from each other one, with bootstrap resampling to estimate confidence intervals. The  
287 results showed at least 15 discriminable categories (95% CI = [15 17]), with a pattern of confusions that was  
288 sometimes intuitive based on psychology (e.g., empathic pain was indistinguishable from excitement, romance  
289 was grouped with adoration and interest with entrancement), but in other cases was counterintuitive (sadness  
290 grouped with awe). This underscores that the visual cortex does not perfectly reproduce human emotional  
291 experience, but nonetheless contain a rich, multidimensional representation of high-level, emotion-related  
292 features, in support of Prediction 2.

293 In additional model comparisons, we tested whether occipital cortex was necessary and sufficient for  
294 accurate prediction of EmoNet's emotion category representation. We compared models trained using brain  
295 activity from individual areas (i.e., V1-V4 (Amunts, Malikovic et al. 2000, Rottschy, Eickhoff et al. 2007) and  
296 inferotemporal cortex (Tzourio-Mazoyer, Landeau et al. 2002)), the entire occipital lobe (Lancaster, Woldorff et  
297 al. 2000), and the whole brain. We trained models to predict variation across images in each EmoNet emotion  
298 category unit, and averaged performance across emotion categories. The whole-occipital-lobe model ( $r = 0.2819$   
299  $\pm .0163$  (*SE*)) and the whole-brain model ( $r = 0.2664 \pm .0150$  (*SE*)) predicted EmoNet emotion categories more  
300 strongly than models based on individual visual areas ( $r = .0703$  to  $0.1635$ , all  $P < .0001$ ). Furthermore, the  
301 occipital lobe model showed marginally better performance than the whole-brain model ( $\Delta r = .0155$ ,  $P = .0404$ ,  
302 95% CI = [0.0008 0.0303], paired t-test), despite having nearly 100,000 fewer features available for prediction  
303 (**Figure S3**). A post hoc, confirmatory test revealed that excluding occipital lobe activation from the whole-brain  
304 model significantly reduced performance ( $\Delta r = -.0240$ ,  $P < .0001$ , 95% CI = [-0.0328 -0.0152], paired t-test),  
305 indicating that activity in the occipital lobe meaningfully contributed to predictions in the whole-brain model.  
306 These results provide strong support for distributed representation of emotion schemas within the occipital lobe  
307 and partially redundant coding of this information in other brain systems. The distributed codes for emotion  
308 categories parallel other recent findings on population coding of affective processes (Chang, Gianaros et al. 2015,  
309 Krishnan, Woo et al. 2016); for review, see ref. (Kragel, Koban et al. 2018).

## 310 **Classifying patterns of visual cortex activity into multiple distinct emotion** 311 **categories**

312 To provide additional evidence that visual cortical representations are emotion category-specific, we  
313 tested whether visual cortical activity was sufficient to decode the category of emotional videos in an independent  
314 dataset ( $N = 32$ ; see ref. Kragel and LaBar 2015). In this dataset, human subjects viewed cinematic film clips that  
315 elicited contentment, sadness, amusement, surprise, fear, and anger. Videos were selected that elicited responses  
316 in one emotion category above all others for each video, complementing the previous study, whose stimuli  
317 elicited more blended emotional responses. We tested predictive accuracy in seven-way classification of emotion

318 category based on subject-average patterns of occipital lobe activity for each condition, with eight-fold cross-  
319 validation across participants to test prediction performance in out-of-sample individuals. We then performed  
320 discriminable cluster identification (**Figures 1 and 4**, see Supplementary Text for details) to estimate how many  
321 distinct emotion categories out of this set are represented in visual cortex.

322         This analysis revealed that of the seven states being classified (six emotions and neutral videos), at least  
323 five distinct emotion clusters (95% CI = [5 7]) could be reliably discriminated from one another based on  
324 occipital lobe activity (5-way classification accuracy = 40.54%, chance = 20% see **Figure 5**), supporting  
325 Prediction 3. Full seven-way classification was 29.95% (chance = 14.3%,  $P = 0.002$ ). Contentment, amusement,  
326 and neutral videos were reliably differentiated from all other emotions. States of fear and surprise were not  
327 discriminable from one another (they were confused 21.09% of the time), yet they were reliably differentiated  
328 from all other emotions. Sadness and anger were also confusable (15.5%) but were discriminable from all other  
329 emotional states. Thus, although some emotional states were similar to one another regarding occipital lobe  
330 activation, we found strong evidence for categorical coding of multiple emotions during movie inductions of  
331 specific emotions.

332

333

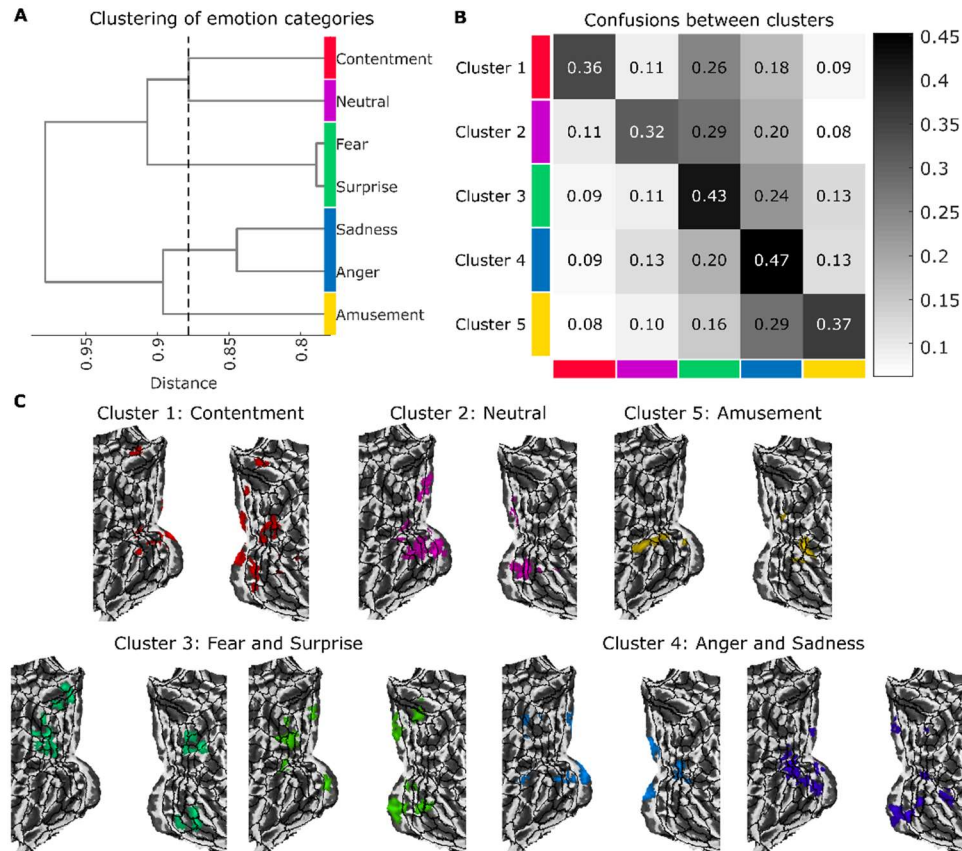

**Figure 5.** Multiclass classification of occipital lobe activity reveals five discriminable emotion clusters. (a) Dendrogram illustrates hierarchical clustering of emotion categories that maximizes discriminability. The x-axis indicates the inner squared distance between emotion categories. The dashed line shows the optimal clustering solution; cluster membership is indicated by color. (b) Confusion matrix for the five-cluster solution depicts the proportion of trials that are classified as belonging to each cluster (shown by the column) as a function of ground truth membership in a cluster (indicated by the row). The overall five-way accuracy is 40.54%, where chance is 20%. (c) Model weights indicate where increasing brain activity is associated with the prediction of each emotion category. Maps are thresholded at a voxel-wise threshold of  $P < .05$  for display.

334

335

336

337

338

339

340

341

342

343

## 344 Discussion

345

346

347

348

349

350

351

Our work demonstrates the intimate relationship between visual perception and emotion. Even though emotions are often about specific objects, events, or situations (Tooby and Cosmides), few accounts of emotion specify how sensory information is transformed into emotion-relevant signals in a computationally explicit fashion (Bach and Dayan 2017). Driven by the hypothesis that emotion schemas are embedded in the human visual system, we developed a computational model (EmoNet) to classify images into 20 different emotion categories. Consistent with our prediction that image features *alone* are sufficient for predicting normative ratings of emotion categories determined by humans, EmoNet accurately classified images into at least 11 different

352 emotion categories in hold-out test data. Supporting our second prediction that EmoNet representations should  
353 map primarily onto the activity of sensory systems (as opposed to subcortical structures or limbic brain regions)  
354 distributed patterns of human occipital lobe activity were the best predictors of emotion category units in EmoNet.  
355 Finally, our third prediction was supported by the observation that patterns of occipital lobe activity were  
356 sufficient for decoding at least 15 emotion categories evoked by images, and at least five of seven emotional  
357 states elicited by cinematic movies. These findings both shed light on how visual processing constrains emotional  
358 responses, and how emotions are represented in the brain.

359 A large body of research has assumed that “low-level” visual information is mainly irrelevant to  
360 emotional processing; it should either be controlled for or explained away, even though studies have shown that  
361 neurons in early visual areas are sensitive to affective information such as reward (Shuler and Bear 2006). Our  
362 model provides a means to disentangle the visual properties of stimuli that are emotion-relevant from those that  
363 are not, and isolate stimulus-related features (e.g., red color serving as an indicator of higher energy content in  
364 fruit (Regan, Julliot et al. 2001, Melin, Chiou et al. 2017)) from more abstract constructs (e.g., the broader  
365 concept of ‘food craving’, which does not require a visual representation). Based on our findings, it seems  
366 unlikely that a complete account of emotion will be devoid of sensory qualities that are naturally associated with  
367 emotional outcomes, or those that are reliably learned through experience and influenced by culture.

368 We found that human ratings of pleasantness and excitement evoked by images can be accurately  
369 modeled as a combination of emotion-specific features (e.g., a mixture of features related to ‘disgust,’ ‘horror,’  
370 ‘sadness,’ and ‘fear’ are highly predictive of unpleasant arousing experiences). Individuals may draw from this  
371 visual information when asked to rate images. The presence of emotion-specific visual features could activate  
372 learned associations with more general feelings of valence and arousal and help guide self-report. It is possible  
373 that feelings of valence and arousal arise from integration across feature detectors or predictive coding about the  
374 causes of interoceptive events, (Seth 2013, Barrett 2017). Rather than being irreducible (Barrett and Bliss-Moreau  
375 2009), these feelings may be constructed from emotionally-relevant sensory information (Lindquist, Satpute et al.

376 2015), such as the emotion-specific features we have identified here, and prior expectations of their affective  
377 significance.

378 In addition to our observation that emotion-specific visual features can predict normative ratings of  
379 valence and arousal, we found that they were effective at classifying the genre of cinematic movie trailers.  
380 Moreover, the emotions that informed prediction were generally consistent with those typically associated with  
381 each genre (e.g., romantic comedies were predicted by activation of ‘romance’ and ‘amusement’). This validation  
382 differed from our other two image-based assessments of EmoNet (i.e., testing on hold-out videos from the  
383 database used for training, and testing on IAPS images) because it examined stimuli that are not conventionally  
384 used in the laboratory, yet are robust elicitors of emotional experience in daily life. Beyond hinting at real-world  
385 applications of our model, integrating results across these three validation tests serves to triangulate our findings  
386 (Lawlor, Tilling et al. 2016, Munafò and Davey Smith 2018), as different methods (with different assumptions  
387 and biases) were used to produce more robust, reproducible results.

388 The fact that emotion category units of EmoNet were best characterized by activity spanning visual cortex  
389 (i.e., the occipital lobe) sheds light on the nature of emotion representation in the brain, providing evidence for a  
390 distributed rather than a modular neural basis of emotion schemas. Activation of schemas in visual cortex offers a  
391 rapid, possibly automatic way of triggering downstream emotional responses in the absence of deliberative or top-  
392 down conceptual processes. By harnessing the parallel and distributed architecture of the visual system, these  
393 representations could be refined through experience. Information from downstream systems via feedback  
394 projections from ventromedial prefrontal cortex or the amygdala (Pessoa and Adolphs 2010, Kravitz, Saleem et  
395 al. 2013) could update visual emotion schemas through learning (Serences 2008, Dunsmoor, Kragel et al. 2014).  
396 Thus, emotion-related activity in visual cortex is most likely not a purely bottom-up response to stimuli or a top-  
397 down interpretation of them, but is at the interface of sensory representations of the environment and prior  
398 knowledge about potential outcomes. Future work integrating computational models with recurrent feedback  
399 (e.g., Nayebi, Bear et al. 2018) and brain responses to emotional images will be necessary to understand the  
400 convergence of bottom-up and top-down signals.

401           Our computational framework provides a way to resolve outstanding theoretical debates in affective  
402 science. It could be used, for example, to test if mappings between visual features and emotions are conserved  
403 across species or change throughout development in humans. Based on evolutionary accounts that suggest certain  
404 basic emotions are solutions to survival challenges, mechanisms for detecting emotionally significant events  
405 should be conserved across species. Notably, some of the most accurately predicted schemas include ‘sexual  
406 desire’ and ‘craving’ which are motivational states that transcend cultures and are linked to clear evolutionary  
407 goals (i.e., to reproduce and to acquire certain nutrients). Work in the domain of object recognition has shown that  
408 representations of objects are highly similar between humans and macaques (Kriegeskorte, Mur et al. 2008), an  
409 extension of the present work is to test whether the emotion representations we identified here are as well.

410           Our work has several limitations that can be addressed in future work. Although our goal was to focus on  
411 visual processing of emotional features, visual stimulation is not the only way in which emotions can be elicited.  
412 Information from other senses (olfactory, auditory, somatic, interoceptive, etc.), memories of past events,  
413 manipulation of motor activation, and mental imagery have all been used to evoke emotional experiences in the  
414 lab. EmoNet can be expanded, potentially by adding more abstract or ‘supramodal’ representation of emotions  
415 (Peelen, Atkinson et al. 2010, Skerry and Saxe 2014, Kim, Shinkareva et al. 2017) and interactions among  
416 different types of sensory information. Incorporating other, more neurally informed mechanisms into the model,  
417 such as recurrence and learning rules that are biologically plausible are possible directions for future development.

418           Using a combination of computational and neuroscientific tools, we have demonstrated that emotion  
419 schemas are embedded in the human visual system. By precisely specifying what makes images emotional, our  
420 modeling framework offers a new approach to understanding how visual inputs can rapidly evoke complex  
421 emotional responses. We anticipate that developing biologically inspired computational models will be a crucial  
422 next step for resolving debates about the nature of emotions (e.g., Adolphs 2017, Barrett 2017, Adolphs and  
423 Andler 2018) and providing practical tools for scientific research and in applied settings.

424

## 425 **References**

- 426 Adolphs, R. (2013). "The biology of fear." *Curr Biol* **23**(2): R79-93.
- 427 Adolphs, R. (2017). "How should neuroscience study emotions? by distinguishing emotion states, concepts, and  
428 experiences." *Social Cognitive and Affective Neuroscience* **12**(1): 24-31.
- 429 Adolphs, R. and D. Andler (2018). "Investigating Emotions as Functional States Distinct From Feelings." *Emotion*  
430 *Review* **10**(3): 191-201.
- 431 Amunts, K., A. Malikovic, H. Mohlberg, T. Schormann and K. Zilles (2000). "Brodmann's Areas 17 and 18 Brought  
432 into Stereotaxic Space—Where and How Variable?" *NeuroImage* **11**(1): 66-84.
- 433 Bach, D. R. and P. Dayan (2017). "Algorithms for survival: a comparative perspective on emotions." *Nat Rev*  
434 *Neurosci* **18**(5): 311-319.
- 435 Barrett, L. F. (2006). "Solving the emotion paradox: categorization and the experience of emotion." *Pers Soc*  
436 *Psychol Rev* **10**(1): 20-46.
- 437 Barrett, L. F. (2017). "The theory of constructed emotion: an active inference account of interoception and  
438 categorization." *Soc Cogn Affect Neurosci* **12**(11): 1833.
- 439 Barrett, L. F. (2017). "The theory of constructed emotion: an active inference account of interoception and  
440 categorization." *Social Cognitive and Affective Neuroscience* **12**(1): 1-23.
- 441 Barrett, L. F. and M. Bar (2009). "See it with feeling: affective predictions during object perception." *Philosophical*  
442 *Transactions of the Royal Society of London B: Biological Sciences* **364**(1521): 1325-1334.
- 443 Barrett, L. F. and E. Bliss-Moreau (2009). "Affect as a psychological primitive." *Advances in experimental social*  
444 *psychology* **41**: 167-218.
- 445 Berridge, K. and P. Winkielman (2003). "What is an unconscious emotion?(The case for unconscious "liking")."  
446 *Cognition and emotion* **17**(2): 181-211.
- 447 Bockholt, H., M. Scully, W. Courtney, S. Rachakonda, A. Scott, A. Caprihan, J. Fries, R. Kalyanam, J. Segall, R.  
448 De La Garza, S. Lane and V. Calhoun (2010). "Mining the mind research network: a novel framework for  
449 exploring large scale, heterogeneous translational neuroscience research data sources." *Frontiers in*  
450 *Neuroinformatics* **3**(36).
- 451 Bouckaert, R. R. and E. Frank (2004). *Evaluating the Replicability of Significance Tests for Comparing Learning*  
452 *Algorithms*, Berlin, Heidelberg, Springer Berlin Heidelberg.
- 453 Bower, G. H. (1981). "Mood and memory." *American Psychologist* **36**(2): 129-148.
- 454 Bradley, M. M. and P. J. Lang (1999). Affective norms for English words (ANEW): Instruction manual and  
455 affective ratings, Citeseer.
- 456 Brainard, D. H. (1997). "The psychophysics toolbox." *Spatial vision* **10**: 433-436.
- 457 Carroll, J. B. (1953). "An analytical solution for approximating simple structure in factor analysis." *Psychometrika*  
458 **18**(1): 23-38.
- 459 Chang, L. J., P. J. Gianaros, S. B. Manuck, A. Krishnan and T. D. Wager (2015). "A Sensitive and Specific Neural  
460 Signature for Picture-Induced Negative Affect." *PLoS Biol* **13**(6): e1002180.
- 461 Cowen, A. S. and D. Keltner (2017). "Self-report captures 27 distinct categories of emotion bridged by continuous  
462 gradients." *Proceedings of the National Academy of Sciences of the United States of America* **114**(38):  
463 E7900-E7909.
- 464 Dahnke, R., R. A. Yotter and C. Gaser (2013). "Cortical thickness and central surface estimation." *Neuroimage* **65**:  
465 336-348.
- 466 Dan-Glauser, E. S. and K. R. Scherer (2011). "The Geneva affective picture database (GAPED): a new 730-picture  
467 database focusing on valence and normative significance." *Behavior Research Methods* **43**(2): 468.
- 468 Dunsmoor, J. E., P. A. Kragel, A. Martin and K. S. LaBar (2014). "Aversive learning modulates cortical  
469 representations of object categories." *Cereb Cortex* **24**(11): 2859-2872.
- 470 Eickhoff, S. B., K. E. Stephan, H. Mohlberg, C. Grefkes, G. R. Fink, K. Amunts and K. Zilles (2005). "A new SPM  
471 toolbox for combining probabilistic cytoarchitectonic maps and functional imaging data." *NeuroImage*  
472 **25**(4): 1325-1335.
- 473 Ekman, P. (1992). "An Argument for Basic Emotions." *Cognition & Emotion* **6**(3-4): 169-200.



- 474 Ekman, P. and D. Cordaro (2011). "What is Meant by Calling Emotions Basic." *Emotion Review* **3**(4): 364-370.
- 475 Eradath, M. K., T. Mogami, G. Wang and K. Tanaka (2015). "Time Context of Cue-Outcome Associations
- 476 Represented by Neurons in Perirhinal Cortex." *The Journal of Neuroscience* **35**(10): 4350-4365.
- 477 Esterman, M., B. J. Tamber-Rosenau, Y.-C. Chiu and S. Yantis (2010). "Avoiding non-independence in fMRI data
- 478 analysis: Leave one subject out." *NeuroImage* **50**(2): 572-576.
- 479 Fontaine, J. R., K. R. Scherer, E. B. Roesch and P. C. Ellsworth (2007). "The world of emotions is not two-
- 480 dimensional." *Psychological science* **18**(12): 1050-1057.
- 481 Gaser, C. and R. Dahnke (2016). "CAT-a computational anatomy toolbox for the analysis of structural MRI data."
- 482 *HBM* **2016**: 336-348.
- 483 Glasser, M. F., T. S. Coalson, E. C. Robinson, C. D. Hacker, J. Harwell, E. Yacoub, K. Ugurbil, J. Andersson, C.
- 484 F. Beckmann, M. Jenkinson, S. M. Smith and D. C. Van Essen (2016). "A multi-modal parcellation of human
- 485 cerebral cortex." *Nature* **536**: 171.
- 486 Glasser, M. F., S. N. Sotiropoulos, J. A. Wilson, T. S. Coalson, B. Fischl, J. L. Andersson, J. Xu, S. Jbabdi, M.
- 487 Webster, J. R. Polimeni, D. C. Van Essen and M. Jenkinson (2013). "The minimal preprocessing pipelines
- 488 for the Human Connectome Project." *NeuroImage* **80**: 105-124.
- 489 Haenny, P. and P. Schiller (1988). "State dependent activity in monkey visual cortex." *Experimental Brain Research*
- 490 **69**(2): 225-244.
- 491 Held, R. and A. Hein (1963). "Movement-produced stimulation in the development of visually guided behavior."
- 492 *Journal of comparative and physiological psychology* **56**(5): 872.
- 493 Izard, C. E. (2007). "Basic Emotions, Natural Kinds, Emotion Schemas, and a New Paradigm." *Perspectives on*
- 494 *Psychological Science* **2**(3): 260-280.
- 495 Kahneman, D. and P. Egan (2011). *Thinking, fast and slow*, Farrar, Straus and Giroux New York.
- 496 Kim, J., S. V. Shinkareva and D. H. Wedell (2017). "Representations of modality-general valence for videos and
- 497 music derived from fMRI data." *NeuroImage* **148**: 42-54.
- 498 Kleiner, M., D. Brainard, D. Pelli, A. Ingling, R. Murray and C. Broussard (2007). "What's new in Psychtoolbox-
- 499 3." *Perception* **s**.
- 500 Kohavi, R. (1995). *A study of cross-validation and bootstrap for accuracy estimation and model selection*. Ijcai,
- 501 Stanford, CA.
- 502 Kragel, P. A., L. Koban, L. F. Barrett and T. D. Wager (2018). "Representation, Pattern Information, and Brain
- 503 Signatures: From Neurons to Neuroimaging." *Neuron* **99**(2): 257-273.
- 504 Kragel, P. A. and K. S. LaBar (2015). "Multivariate neural biomarkers of emotional states are categorically distinct."
- 505 *Soc Cogn Affect Neurosci* **10**(11): 1437-1448.
- 506 Kravitz, D. J., K. S. Saleem, C. I. Baker, L. G. Ungerleider and M. Mishkin (2013). "The ventral visual pathway:
- 507 An expanded neural framework for the processing of object quality." *Trends in cognitive sciences* **17**(1): 26-
- 508 49.
- 509 Kriegeskorte, N., M. Mur, D. A. Ruff, R. Kiani, J. Bodurka, H. Esteky, K. Tanaka and P. A. Bandettini (2008).
- 510 "Matching categorical object representations in inferior temporal cortex of man and monkey." *Neuron* **60**(6):
- 511 1126-1141.
- 512 Krishnan, A., C. W. Woo, L. J. Chang, L. Ruzic, X. Gu, M. Lopez-Sola, P. L. Jackson, J. Pujol, J. Fan and T. D.
- 513 Wager (2016). "Somatic and vicarious pain are represented by dissociable multivariate brain patterns." *Elife*
- 514 **5**.
- 515 Krizhevsky, A., I. Sutskever and G. E. Hinton (2012). *Imagenet classification with deep convolutional neural*
- 516 *networks*. Advances in neural information processing systems.
- 517 Kurdi, B., S. Lozano and M. R. Banaji (2017). "Introducing the Open Affective Standardized Image Set (OASIS)." *Behavior Research Methods* **49**(2): 457-470.
- 518 Lancaster, J. L., M. G. Woldorff, L. M. Parsons, M. Liotti, C. S. Freitas, L. Rainey, P. V. Kochunov, D. Nickerson,
- 520 S. A. Mikiten and P. T. Fox (2000). "Automated Talairach atlas labels for functional brain mapping." *Hum*
- 521 *Brain Mapp* **10**(3): 120-131.
- 522 Lang, P. and M. M. Bradley (2007). "The International Affective Picture System (IAPS) in the study of emotion
- 523 and attention." *Handbook of emotion elicitation and assessment* **29**.

- 524 Lang, P. J., M. M. Bradley and B. N. Cuthbert (2008). International affective picture system (IAPS): Affective  
525 ratings of pictures and instruction manual, University of Florida, Gainesville, FL.
- 526 Lawlor, D. A., K. Tilling and G. Davey Smith (2016). "Triangulation in aetiological epidemiology." International  
527 Journal of Epidemiology **45**(6): 1866-1886.
- 528 Lazarus, R. S. (1966). "Psychological stress and the coping process."
- 529 Lazarus, R. S. (1968). Emotions and adaptation: Conceptual and empirical relations. Nebraska symposium on  
530 motivation, University of Nebraska Press.
- 531 Libkuman, T. M., H. Otani, R. Kern, S. G. Viger and N. Novak (2007). "Multidimensional normative ratings for  
532 the International Affective Picture System." Behavior Research Methods **39**(2): 326-334.
- 533 Lindquist, K. A., A. B. Satpute, T. D. Wager, J. Weber and L. F. Barrett (2015). "The brain basis of positive and  
534 negative affect: evidence from a meta-analysis of the human neuroimaging literature." Cerebral Cortex  
535 **26**(5): 1910-1922.
- 536 MacLean, P. D. (1952). "Some psychiatric implications of physiological studies on frontotemporal portion of limbic  
537 system (visceral brain)." Clinical Neurophysiology **4**(4): 407-418.
- 538 Mayberg, H. S., M. Liotti, S. K. Brannan, S. McGinnis, R. K. Mahurin, P. A. Jerabek, J. A. Silva, J. L. Tekell, C.  
539 C. Martin, J. L. Lancaster and P. T. Fox (1999). "Reciprocal limbic-cortical function and negative mood:  
540 converging PET findings in depression and normal sadness." Am J Psychiatry **156**(5): 675-682.
- 541 McAlonan, K., J. Cavanaugh and R. H. Wurtz (2008). "Guarding the gateway to cortex with attention in visual  
542 thalamus." Nature **456**(7220): 391.
- 543 Melin, A. D., K. L. Chiou, E. R. Walco, M. L. Bergstrom, S. Kawamura and L. M. Fedigan (2017). "Trichromacy  
544 increases fruit intake rates of wild capuchins (*Cebus capucinus imitator*)." Proceedings of the National  
545 Academy of Sciences **114**(39): 10402-10407.
- 546 Mikels, J. A., B. L. Fredrickson, G. R. Larkin, C. M. Lindberg, S. J. Maglio and P. A. Reuter-Lorenz (2005).  
547 "Emotional category data on images from the International Affective Picture System." Behavior research  
548 methods **37**(4): 626-630.
- 549 Mogami, T. and K. Tanaka (2006). "Reward Association Affects Neuronal Responses to Visual Stimuli in Macaque  
550 TE and Perirhinal Cortices." The Journal of Neuroscience **26**(25): 6761-6770.
- 551 Moors, A. (2018). Appraisal Theory of Emotion. Encyclopedia of Personality and Individual Differences. V.  
552 Zeigler-Hill and T. K. Shackelford. New York, Springer.
- 553 Morris, J. S., K. J. Friston, C. Büchel, C. D. Frith, A. W. Young, A. J. Calder and R. J. Dolan (1998). "A  
554 neuromodulatory role for the human amygdala in processing emotional facial expressions." Brain **121**(1):  
555 47-57.
- 556 Munafò, M. R. and G. Davey Smith (2018). "Robust research needs many lines of evidence." Nature **553**(7689):  
557 399-401.
- 558 Nayebi, A., D. Bear, J. Kubilius, K. Kar, S. Ganguli, D. Sussillo, J. J. DiCarlo and D. L. Yamins (2018). "Task-  
559 Driven Convolutional Recurrent Models of the Visual System." arXiv preprint arXiv:1807.00053.
- 560 Niedenthal, P. M. (2007). "Embodying emotion." Science **316**(5827): 1002-1005.
- 561 O'Connor, D. H., M. M. Fukui, M. A. Pinsk and S. Kastner (2002). "Attention modulates responses in the human  
562 lateral geniculate nucleus." Nature neuroscience **5**(11): 1203.
- 563 Öhman, A. and S. Mineka (2003). "The malicious serpent: Snakes as a prototypical stimulus for an evolved module  
564 of fear." Current directions in psychological science **12**(1): 5-9.
- 565 Panksepp, J. (1998). Affective neuroscience : the foundations of human and animal emotions. New York, Oxford  
566 University Press.
- 567 Peelen, M. V., A. P. Atkinson and P. Vuilleumier (2010). "Supramodal representations of perceived emotions in  
568 the human brain." J Neurosci **30**(30): 10127-10134.
- 569 Pessiglione, M., B. Seymour, G. Flandin, R. J. Dolan and C. D. Frith (2006). "Dopamine-dependent prediction  
570 errors underpin reward-seeking behaviour in humans." Nature **442**(7106): 1042-1045.
- 571 Pessoa, L. (2008). "On the relationship between emotion and cognition." Nature Reviews Neuroscience **9**(2): 148-  
572 158.
- 573 Pessoa, L. and R. Adolphs (2010). "Emotion processing and the amygdala: from a 'low road' to 'many roads' of  
574 evaluating biological significance." Nat Rev Neurosci **11**(11): 773-783.

- 575 Plutchik, R. (1997). The circumplex as a general model of the structure of emotions and personality, American  
576 Psychological Association.
- 577 Rasheed, Z. and M. Shah (2002). Movie genre classification by exploiting audio-visual features of previews. Object  
578 recognition supported by user interaction for service robots.
- 579 Recanzone, G., C. Schreiner and M. Merzenich (1993). "Plasticity in the frequency representation of primary  
580 auditory cortex following discrimination training in adult owl monkeys." The Journal of Neuroscience **13**(1):  
581 87-103.
- 582 Regan, B. C., C. Julliot, B. Simmen, F. Viénot, P. Charles-Dominique and J. D. Mollon (2001). "Fruits, foliage and  
583 the evolution of primate colour vision." Philosophical Transactions of the Royal Society of London. Series  
584 B: Biological Sciences **356**(1407): 229-283.
- 585 Rifkin, R. and A. Klautau (2004). "In Defense of One-Vs-All Classification." J. Mach. Learn. Res. **5**: 101-141.
- 586 Rottschy, C., S. B. Eickhoff, A. Schleicher, H. Mohlberg, M. Kujovic, K. Zilles and K. Amunts (2007). "Ventral  
587 visual cortex in humans: Cytoarchitectonic mapping of two extrastriate areas." Human Brain Mapping  
588 **28**(10): 1045-1059.
- 589 Russell, J. A. (1980). "A circumplex model of affect." Journal of personality and social psychology **39**(6): 1161.
- 590 Russell, J. A. (2003). "Core affect and the psychological construction of emotion." Psychol Rev **110**(1): 145-172.
- 591 Russell, J. A. and L. F. Barrett (1999). "Core affect, prototypical emotional episodes, and other things called  
592 emotion: dissecting the elephant." Journal of personality and social psychology **76**(5): 805.
- 593 Saarimaki, H., L. F. Ejtchadian, E. Glerean, I. P. Jaaskelainen, P. Vuilleumier, M. Sams and L. Nummenmaa (2018).  
594 "Distributed affective space represents multiple emotion categories across the human brain." Soc Cogn  
595 Affect Neurosci **13**(5): 471-482.
- 596 Saarimaki, H., A. Gotsopoulos, I. P. Jaaskelainen, J. Lampinen, P. Vuilleumier, R. Hari, M. Sams and L.  
597 Nummenmaa (2016). "Discrete Neural Signatures of Basic Emotions." Cereb Cortex **26**(6): 2563-2573.
- 598 Sasikumar, D., E. Emeric, V. Stuphorn and C. E. Connor (2018). "First-Pass Processing of Value Cues in the Ventral  
599 Visual Pathway." Current Biology **28**(4): 538-548.e533.
- 600 Scherer, K. R. (1984). On the nature and function of emotion: A component process approach. Approaches to  
601 emotion. K. R. Scherer and P. Ekman. Hillsdale, NJ: Erlbaum: 293-317.
- 602 Serences, J. T. (2008). "Value-based modulations in human visual cortex." Neuron **60**(6): 1169-1181.
- 603 Seth, A. K. (2013). "Interoceptive inference, emotion, and the embodied self." Trends Cogn Sci **17**(11): 565-573.
- 604 Shuler, M. G. and M. F. Bear (2006). "Reward Timing in the Primary Visual Cortex." Science **311**(5767): 1606-  
605 1609.
- 606 Skerry, A. E. and R. Saxe (2014). "A common neural code for perceived and inferred emotion." J Neurosci **34**(48):  
607 15997-16008.
- 608 Stephens, C. L., I. C. Christie and B. H. Friedman (2010). "Autonomic specificity of basic emotions: Evidence from  
609 pattern classification and cluster analysis." Biological Psychology **84**(3): 463-473.
- 610 Tellegen, A., D. Watson and L. A. Clark (1999). "On the dimensional and hierarchical structure of affect." Psychological Science **10**(4): 297-303.
- 611 Tooby, J. and L. Cosmides (2008). "The evolutionary psychology of the emotions and their relationship to internal  
612 regulatory variables."
- 613 Tzourio-Mazoyer, N., B. Landeau, D. Papathanassiou, F. Crivello, O. Etard, N. Delcroix, B. Mazoyer and M. Joliot  
614 (2002). "Automated Anatomical Labeling of Activations in SPM Using a Macroscopic Anatomical  
615 Parcellation of the MNI MRI Single-Subject Brain." NeuroImage **15**(1): 273-289.
- 616 Vedaldi, A. and K. Lenc (2015). Matconvnet: Convolutional neural networks for matlab. Proceedings of the 23rd  
617 ACM international conference on Multimedia, ACM.
- 618 Vuilleumier, P., M. P. Richardson, J. L. Armony, J. Driver and R. J. Dolan (2004). "Distant influences of amygdala  
619 lesion on visual cortical activation during emotional face processing." Nature Neuroscience **7**: 1271.
- 620 Warriner, A. B., V. Kuperman and M. Brysbaert (2013). "Norms of valence, arousal, and dominance for 13,915  
621 English lemmas." Behavior research methods **45**(4): 1191-1207.
- 622 Yamins, D. L., H. Hong, C. F. Cadieu, E. A. Solomon, D. Seibert and J. J. DiCarlo (2014). "Performance-optimized  
623 hierarchical models predict neural responses in higher visual cortex." Proc Natl Acad Sci U S A **111**(23):  
624 8619-8624.

626 Yamins, D. L. K. and J. J. DiCarlo (2016). "Using goal-driven deep learning models to understand sensory cortex."  
627 Nature Neuroscience **19**: 356.  
628 Zajonc, R. B. (1984). "On the primacy of affect."

## 629 **Acknowledgments**

630 **Funding:** This work was supported by the following sources of funding: NIH National Institute of Mental Health  
631 R01 MH116026 and NIH National Institute on Drug Abuse T32 DA017637-14.

632 **Author contributions:** conceptualization, P.A.K. and T.D.W.; investigation, P.A.K. and M.R.; methodology,  
633 P.A.K., M.R., K.S.L., and T.D.W.; software, P.A.K. and T.D.W.; writing – original draft, P.A.K., M.R., K.S.L.,  
634 and T.D.W.; writing – review and editing P.A.K., M.R., K.S.L., and T.D.W.; visualization, P.A.K., supervision,  
635 T.D.W.

636 **Competing interests:** the authors declare no competing interests

637 **Data and code availability:** fMRI data are available at <https://www.neurovault.org>, analysis code is available at  
638 <https://github.com/canlab>

639

## 640 **Materials and Methods**

### 641 **Computational model development**

642 We used a large database of emotional video clips (Cowen and Keltner 2017) for developing  
643 EmoNet. This database includes 2,185 videos that are well characterized by 27 distinct emotion  
644 categories. A total of 137,482 frames were extracted from the videos and divided into training and  
645 testing samples using a 90-10 split. Emotion categories that had fewer than 1,000 frames for training  
646 were excluded from the model, reducing the emotions included in the model to 'adoration', 'aesthetic  
647 appreciation', 'amusement', 'anxiety', 'awe', 'boredom', 'confusion', 'craving', 'disgust', 'empathic pain',  
648 'entrancement', 'excitement', 'fear', 'horror', 'interest', 'joy', 'romance', 'sadness', 'sexual desire', and  
649 'surprise'. The pre-trained CNN model AlexNet (Krizhevsky, Sutskever et al. 2012) was downloaded for  
650 use in MATLAB via MatConvNet (Vedaldi and Lenc 2015). We fixed all but the last fully-connected  
651 layer of AlexNet, and we retrained the model after replacing the 1,000 target object categories with the  
652 20 emotion categories listed above. Training was performed using stochastic gradient descent with  
653 momentum, an initial learning rate of 0.0001, and a mini-batch size of 16.

### 654 **Computational model validation**

655 Three separate tests were performed to assess model performance: 1) validation on the hold-out  
656 dataset, 2) predicting normative ratings of valence and arousal for the International Affective Picture  
657 System (IAPS, a standardized set of affective images used in psychological research (Lang, Bradley et  
658 al. 2008)), and 3) predicting the genre of cinematic movie trailers.

659 For the hold-out dataset, we computed standard signal detection metrics (i.e., AUC, sensitivity,  
660 and specificity) and evaluated overall model performance and that for each category. We performed  
661 inference on model performance by generating null distributions through random permutation of test-set

662 labels. Additionally, EmoNet's performance was compared to that of AlexNet to determine how much  
663 retraining the last fully-connected layer improved performance. For this purpose, we randomly sampled  
664 AlexNet predictions for 20 object categories to compute relevant signal detection metrics 10,000 times  
665 in addition to finding the 20 unique object categories that best predicted the 20 emotions.

666 We assessed the generalizability of EmoNet on IAPS images by using activations in the last  
667 fully-connected layer to predict normative ratings of valence and arousal. This analysis was performed  
668 using Partial Least Squares regression (with bootstrap procedures to estimate the variance of parameter  
669 estimates), and ten iterations of 10-fold cross-validation (Bouckaert and Frank 2004) to determine the  
670 correlation between model predictions and 'ground truth' normative ratings. We averaged normative  
671 ratings and EmoNet predictions for each of 25 quantiles. The construct validity of model parameters  
672 (e.g., whether greater activations of 'amusement,' as opposed to 'fear,' were associated with higher  
673 valence norms) and cross-validated estimates of root mean square error served as outcomes of interest.

674 In the final validation test, we used activations in the last fully-connected layer to classify the  
675 genre of movie trailers ( $N = 28$ , sampling from romantic comedy, horror, and action movies; see  
676 Appendix I). Trailers were selected based on genres listed on <https://www.imdb.com/feature/genre/> and  
677 their availability at <http://www.hd-trailers.net/>. Classification into different genres was performed using  
678 Partial Least Squares regression (with bootstrap procedures to estimate the variance of parameter  
679 estimates), and 10-fold cross-validation to estimate the accuracy of classification into different genres.  
680 The construct validity of model parameters (e.g., whether greater activations of 'amusement' predicted  
681 romantic comedies) and cross-validated estimates of classification accuracy served as outcomes of  
682 interest.

683 **fMRI experiment I: modeling brain responses to emotional images**

684 **Participants.** We recruited eighteen healthy, right-handed individuals (10 Female,  $M_{age} = 25$ )  
685 from the Boulder area. As there were, to our knowledge, no prior studies relating activation in  
686 convolutional neural nets to human fMRI responses to emotional images, this sample size was not  
687 determined a priori. The experimental design focused on maximizing task-related signal within subjects  
688 by showing participants 112 affective images. Confirmatory post-hoc analysis of effect size and the  
689 variance of parameter estimates corroborated that this sample size was sufficient for reliably detecting  
690 effects and minimizing the variance of parameter estimates (e.g., predicting EmoNet outcomes from  
691 occipital lobe activity using a random sample of only 9 participants produced an average effect size of  $d$   
692 = 3.08, 95% CI = [2.08 4.36], see **Figure S4**). Participants did not meet DSM V criteria for any  
693 psychological disorder and were screened to ensure safety in the MR environment. All participants  
694 provided informed consent before the experiment in accordance with the University of Colorado  
695 Boulder Institutional Review Board

696 **Experimental paradigm.** In this experiment, brain activity was measured using fMRI while  
697 participants viewed a series of emotional images. Stimuli were selected from the IAPS and the Geneva  
698 Affective PicturE Database (GAPED) using published normative arousal ratings, to have either positive  
699 or negative valence and high arousal (Mikels, Fredrickson et al. 2005, Libkuman, Otani et al. 2007,  
700 Lang, Bradley et al. 2008, Dan-Glauser and Scherer 2011). A total of 112 images were used for this  
701 experiment.

702 Image presentation lasted 4s, with a jittered inter-trial-interval of 3 to 8-seconds (average ISI =  
703 4s). The scanning session was divided into two runs lasting 7.5 minutes, where the images were  
704 presented in a randomized order. Stimulus presentation was controlled using code written in MATLAB  
705 using the Psychophysics toolbox extension (Brainard 1997, Kleiner, Brainard et al. 2007).

706           **MRI data acquisition.** Gradient-echo echo-planar imaging BOLD-fMRI was performed on a 3  
707 Tesla Siemens MRI scanner (Siemens Healthcare). Functional images were acquired using Multiband  
708 EPI sequence: echo time = 30 ms, repetition time = 765 ms, flip angle = 44°, number of slices = 80, slice  
709 orientation = coronal, phase encoding = h > f, voxel size = 1.6 × 1.6 × 2.0 mm, gap between slices = 0  
710 mm, field of view = 191 × 191 mm<sup>2</sup>, Multi-band acceleration factor = 8; echo spacing = 0.72 ms,  
711 bandwidth = 1,724 Hz per pixel, partial Fourier in the phase encode direction: 7/8.

712           Structural images were acquired using a single shot T1 MPRAGE sequence: echo time = 2.01  
713 ms, repetition time = 2.4 s, flip angle = 8°, number of slices = 224, slice orientation = sagittal, voxel size  
714 = 0.8 mm isotropic, gap between slices = 0 mm, field of view = 256 × 256 mm<sup>2</sup>, GRAPPA acceleration  
715 factor = 2; echo spacing = 7.4 ms, bandwidth = 240 Hz per pixel.

716           **MRI preprocessing.** Multiband brain imaging data were preprocessed following procedures  
717 used in the Human Connectome Project (Glasser, Sotiropoulos et al. 2013). This approach includes  
718 distortion correction, spatial realignment based on translation (in the transverse, sagittal, and coronal  
719 planes) and rotation (roll, pitch, and yaw), spatial normalization to MNI152 space using T1 data, and  
720 smoothing using a 6mm FWHM Gaussian kernel. Preprocessing was completed using the Mind  
721 Research Network's Auto-Analysis software (Bockholt, Scully et al. 2010).

722           **MRI analysis.** Preprocessed fMRI data were analyzed using general linear models with SPM 8  
723 software (Wellcome Trust Centre for Neuroimaging, UK). Separate models were estimated for each  
724 participant that included: 1) a regressor for every image presented to subjects, modeled as a 4s boxcar  
725 convolved with the canonical hemodynamic response function of SPM, 2) 24 motion covariates from  
726 spatial realignment (i.e., translation in x, y, and z dimensions; roll, pitch, and yaw; and their first and  
727 second order temporal derivatives), 3) nuisance regressors specifying outlier timepoints, or 'spikes', that



728 had large deviations in whole-brain BOLD signal, and 4) constant terms to model the mean of each  
729 imaging session.

730 To identify mappings between patterns of brain activity and features of EmoNet, partial least  
731 squares (PLS) regression models were fit on data from the entire sample ( $N = 18$ ) using the full set of  
732 single-trial parameter estimates (112 trials for each subject) as input and activation in the last fully-  
733 connected layer of EmoNet as the output (20 different variables, one per emotion category). Model  
734 generalization (indicated by the correlation between observed and predicted outcomes and mean squared  
735 error) was estimated using leave-one-subject-out cross-validation. Inference on model performance was  
736 performed through permutation testing, where model features (i.e., activation in layer fc8) were  
737 randomly shuffled on each of 10,000 iterations. Performance relative to the noise ceiling was estimated  
738 by computing the ratio of cross-validated estimates to those using resubstitution (which should yield  
739 perfect performance in a noiseless setting; see Supplementary Text).

740 Inference on parameter estimates from PLS was performed via bootstrap resampling with 1,000  
741 replicates, using the mean and standard error of the bootstrap distribution to compute  $P$ -values based on  
742 a normal distribution. Bootstrap distributions were visually inspected to verify that they were  
743 approximately normal. Thresholding of maps was performed using False Discovery Rate (FDR)  
744 correction with a threshold of  $q < .05$ . To visualize all 20 models in a low dimensional space, principal  
745 component decomposition was performed on PLS regression coefficients on every bootstrap iteration to  
746 produce a set of orthogonal components and associated coefficients comprising a unique pattern of  
747 occipital lobe voxels. Procedures for inference and thresholding were identical to those used for  
748 parameter estimates, only they were applied to coefficients from the PCA. Brain maps in the main  
749 figures are unthresholded for display. All results reported in the main text of the manuscript (and  
750 supplementary figures) survive FDR correction for multiple comparisons.

751 **fMRI experiment II: classifying brain responses to emotional film clips**

752 fMRI data used for validating the model have been published previously; here we briefly  
753 summarize the procedure. Full details can be found in Kragel et al. (Kragel and LaBar 2015).

754 **Participants.** We used the full sample ( $N = 32$ ) from an archival dataset characterizing brain  
755 responses to emotional films and music clips. For this analysis, which focuses on visual processing, we  
756 used only brain responses to film stimuli (available at <http://www.neurovault.org>). These data comprise  
757 single-trial estimates of brain activity for stimuli used to evoke experiences that were rated as being  
758 emotionally neutral in addition to states of contentment, amusement, surprise, fear, anger, and sadness.

759 **Experimental paradigm.** Participants completed an emotion induction task where they were  
760 presented with an emotional stimulus and subsequently provided on-line self-reports of emotional  
761 experience. Each trial started with the presentation of either a film or music clip (mean duration = 2.2  
762 minutes), immediately followed by a 23-item affect self-report scale (Stephens, Christie et al. 2010)  
763 lasting 1.9 min followed by a 1.5 min washout clip to minimize carry-over effects.

764 **MRI data acquisition.** Scanning was performed on a 3 Tesla General Electric MR 750 system  
765 with 50-mT/m gradients and an eight-channel head coil for parallel imaging (General Electric,  
766 Waukesha, WI, USA). High-resolution images were acquired using a 3D fast SPGR BRAVO pulse  
767 sequence: repetition time (TR) = 7.58 ms; echo time (TE) = 2.936 ms; image matrix =  $256^2$ ;  $\alpha = 12^\circ$ ;  
768 voxel size = 1 x 1 x 1 mm; 206 contiguous slices. These structural images were aligned in the near-axial  
769 plane defined by the anterior and posterior commissures. Whole-brain functional images were acquired  
770 using a spiral-in pulse sequence with sensitivity encoding along the axial plane (TR = 2000 ms; TE = 30  
771 ms; image matrix = 64 x 128,  $\alpha = 70^\circ$ ; voxel size = 3.8 x 3.8 x 3.8 mm; 34 contiguous slices).

772           **MRI preprocessing.** fMRI data were preprocessed using SPM8  
773 (<http://www.fil.ion.ucl.ac.uk/spm>). Images were first realigned to the first image of the series using a  
774 six-parameter, rigid-body transformation. The realigned images were then coregistered to each  
775 participant's T1-weighted structural image and normalized to MNI152 space using high-dimensional  
776 warping implemented in the VBM8 toolbox. No additional smoothing was applied to the normalized  
777 images.

778           **MRI analysis.** A univariate general linear model (GLM) was used to create images for the  
779 prediction analysis. The model included separate boxcar regressors indicating the onset times for each  
780 stimulus, which allowed us to isolate responses to each emotion category. Separate regressors for the  
781 rating periods were included in the model but were not of interest. All regressors were convolved with  
782 the canonical HRF used in SPM, and an additional six covariate regressors modeled for movement  
783 effects.

784           Pattern classification of occipital lobe responses to the film clips was performed using Partial  
785 Least Squares Discriminant Analysis (PLS-DA; following methods in ref. (Kragel and LaBar 2015)).  
786 The data comprised 444 trials total (2 videos x 7 emotion categories x 32 subjects, with four trials  
787 excluded due to technical issues during scanning). Measures of classification performance were  
788 estimated using 8-fold subject independent cross-validation, where subjects were randomly divided into  
789 eight groups; classification models were iteratively trained on data from all but one group, and model  
790 performance was assessed on data from the hold-out group. This procedure was repeated until all data  
791 had been used for training and testing (8 folds total). Inference on model performance was made using  
792 permutation tests, where the above cross-validation procedure was repeated 1,000 times with randomly  
793 permuted class labels to produce a null distribution for inference. The number of emotion categories that  
794 could be accurately discriminated from one another was estimated using Discriminable Cluster

795 Identification (see Supplementary Text for details). Inference on model weights (i.e., PLS parameter  
796 estimates) at each voxel was made via bootstrap resampling with a normal approximated interval.

797 ***Definition of regions-of-interest (ROIs).***

798 A region-of-interest (ROI) approach was used to restrict features for model development and to localize  
799 where information about emotions is encoded. We selected several anatomically defined ROIs based on  
800 our focus on the visual system. These regions include multiple cytoarchitecturally defined visual areas  
801 (i.e., V1, V2, V3v, V3d, V3a, and V4 (Amunts, Malikovic et al. 2000, Rottschy, Eickhoff et al. 2007)),  
802 the entire occipital lobe (Lancaster, Woldorff et al. 2000), and inferotemporal cortex (Tzourio-Mazoyer,  
803 Landeau et al. 2002). These masks were created using the SPM Anatomy toolbox (Eickhoff, Stephan et  
804 al. 2005) and the Automated Anatomical Labeling atlas (Tzourio-Mazoyer, Landeau et al. 2002).

805
